# Supplementary material
Source: Springer Nature journal article supplement (https://www.springermedizin.de/resource/supplementary/12875_2014_1093_MOESM3_ESM.pdf/9435788)

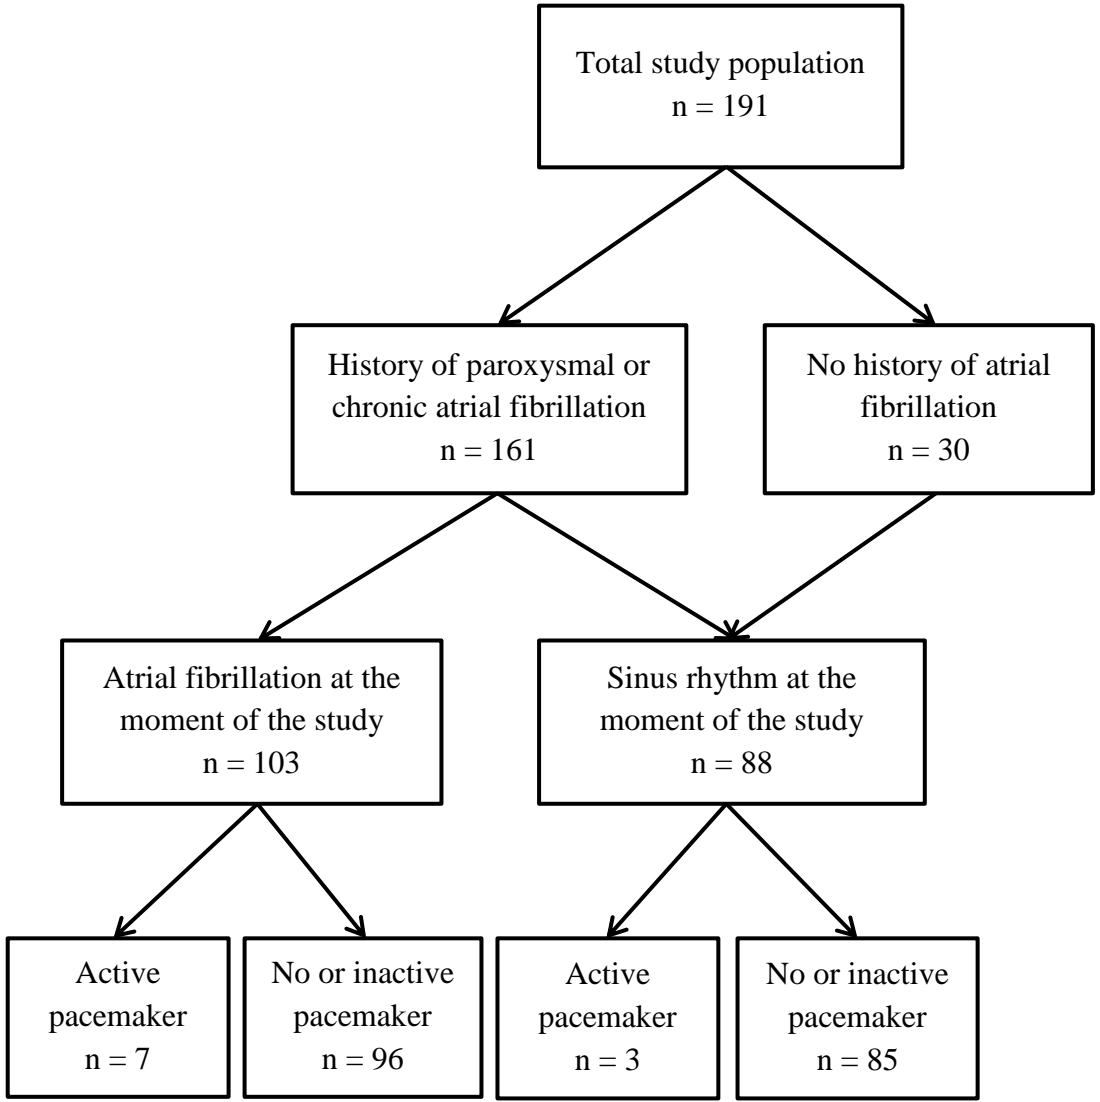

Supplement: MOESM3 [file 9435788]
